# Supplementary material
Source: ML conference proceedings conference paper supplement (https://openaccess.thecvf.com/content/ICCV2023/html/Ghoddoosian_Weakly-Supervised_Action_Segmentation_ICCV_2023_paper.html)
Supplement: Supplementary file 1 [file Ghoddoosian_Weakly-Supervised_Action_Segmentation_ICCV_2023_supplemental.zip]

# Appendix: Weakly-Supervised Action Segmentation and Unseen Error Detection in Anomalous Instructional Videos

Reza Ghoddoosian

Isht Dwivedi

Nakul Agarwal

Behzad Darisuh

Honda Research Institute, USA

{reza.ghoddoosian, idwivedi, nakulagarwal, bdariush}@honda-ri.com

## 1. Overview

In this appendix, we provide a glossary of the symbols used in the paper as a reference. Then, we describe details of our 11 defined error classes and clarify the privacy concerns in our subject recruitment for the ATA dataset. We conclude by a discussion on the real-time performance of our proposed unconstrained Viterbi algorithm.

## 2. Table of Symbols

Table 1 provides definitions of symbols for the readers to refer to.

## 3. ATA Dataset

### 3.1. Error Labels

Table 2 and Table 3, respectively, describe our defined error labels and error functions.

### 3.2. Subject Recruitment

We recruited 32 volunteer participants to collect the ATA dataset. Each participant took part in the data collection process after signing a consent form, and they agreed to having their data released to the public. However, in order to protect the privacy of the participants, faces are blurred and videos are muted.

## 4. Real-time Performance Details

Table 3 of the main paper shows the average fps given different beam size and threshold values. We report our fps on the ATA dataset based on inference every 30 frames on a single NVIDIA Quadro RTX6000. Note that a precision of 30 frames (1 second) to segment actions is a reasonable choice as no action duration is less than 1 second. Theoretically, with an inference rate of 1 inference per frame and  $\tau = 0.7$ , the fps values in Table 3 should be divided by 30. Even in this case with a smaller beam size ( $B < 150$ ), real-time performance is achieved with hardly losing any accuracy.

Table 1. Definitions of symbols used in the paper.

| Symbol                                   | Definition                                                                                                                        |
|------------------------------------------|-----------------------------------------------------------------------------------------------------------------------------------|
| $\mathbb{A}$                             | The set of all actions in the dataset                                                                                             |
| $ \mathbb{A} $                           | Number of actions classes                                                                                                         |
| $a_n$                                    | Action variable at segment $n$                                                                                                    |
| $\mathbf{a}_1^n$                         | Sequence of action labels from segment 1 to segment $n$                                                                           |
| $\bar{\mathbf{a}}_1^n$                   | Inferred sequence of action labels                                                                                                |
| $\bar{\mathbf{A}}_t$                     | Anticipated action probability vector of time $t$                                                                                 |
| $\bar{\mathbf{A}}_i^j$                   | Anticipation vector from time $i$ to time $j$                                                                                     |
| $B$                                      | Beam size for pruning                                                                                                             |
| $\mathbb{E}_\tau(\mathbf{a}_1^{n-1}, t)$ | Set of possible action labels for segment $n$                                                                                     |
| $\mathcal{E}$                            | Set of error labels                                                                                                               |
| $\mathcal{F}_e$                          | Error function for error $e$ (Table 3)                                                                                            |
| $\mathbf{f}^0$                           | action frequency vector for $\tau = 0$                                                                                            |
| $\mathbf{f}^\tau$                        | action frequency vector for $\tau > 0$                                                                                            |
| $I$                                      | Error Instructions (Table 2)                                                                                                      |
| LCS                                      | Longest Common Subsequence                                                                                                        |
| $\mathcal{L}$                            | Overall loss                                                                                                                      |
| $\mathcal{L}_{\text{CDFL}}$              | CDFL loss                                                                                                                         |
| $l_1^n$                                  | Sequence of action durations from segment 1 to segment $n$                                                                        |
| $\mathcal{N}^+(\mathbf{a}_i^j)$          | Set of all actions that succeed sequence $\mathbf{a}_i^j$                                                                         |
| $n_t$                                    | Segment number at time $t$                                                                                                        |
| $n_e$                                    | Number of instances for error $e$                                                                                                 |
| $P_t[l_n, \mathbf{a}_1^n]$               | Probability of the most likely alignment of $\mathbf{a}_1^n$ until time $t$ where $a_n$ is incomplete and has a duration of $l_n$ |
| $p_{\text{mode}}()$                      | Probability in the online or offline <b>mode</b>                                                                                  |
| $Q[]$                                    | Temporary variable in Algorithm 1                                                                                                 |
| $\bar{\mathbf{R}}_t$                     | Current action probability vector of time $t$                                                                                     |
| $S_t^B(a)$                               | The top $B$ most likely segmentation results ending with action $a$ at time $t$                                                   |
| $s()$                                    | Cosine similarity                                                                                                                 |
| $S^0$                                    | Reference offline segmentation when $\tau = 0$                                                                                    |
| $S^\tau$                                 | Offline segmentation when $\tau > 0$                                                                                              |
| $\mathcal{T}_s$                          | The set of all seen transcripts                                                                                                   |
| $\mathcal{T}_u$                          | The set of all unseen test transcripts                                                                                            |
| $\mathcal{T}_v$                          | The set of all validation transcripts                                                                                             |
| $\mathcal{T}_t$                          | The set of all training transcripts                                                                                               |
| $\mathcal{T}_t^C$                        | A subset of the training transcripts                                                                                              |
| $\text{top}^B\{A\}$                      | Function to retrieve the top $B$ values in a set $A$                                                                              |
| $t_{\hat{n}}$                            | Transition time into segment $\hat{n}$                                                                                            |
| $\mathbb{V}$                             | The set of all videos in the dataset                                                                                              |
| $\omega$                                 | Future anticipation range                                                                                                         |
| $\mathbf{x}_1^t$                         | Sequence of video features from frame 1 to frame $t$                                                                              |
| $\theta_a$                               | Parameters for the anticipation network                                                                                           |
| $\theta_r$                               | Parameters for the recognition network                                                                                            |
| $\lambda_a$                              | Coefficient of the anticipation term in the loss function                                                                         |

Table 2. Description of 11 Error classes that are only present in the validation and test sets.

| Error                   | Definition                                                                                                                                                               |
|-------------------------|--------------------------------------------------------------------------------------------------------------------------------------------------------------------------|
| idle time               | Background (bg) segments in the middle of assembly. All training videos include a continuous assembly process without any background segments interrupting the assembly. |
| dropped item w/o pickup | Not picking up an item that is dropped. In the training set all dropped items are retrieved.                                                                             |
| missing part            | Not using all three required parts to assemble the airplane in task 1.                                                                                                   |
| missing ring            | Not using any rings while assembling the airplane (task 1) or the record player (task 3).                                                                                |
| missing leg             | Assembling a table (task 2) without the use of all four legs (blocks).                                                                                                   |
| unfastened leg          | Not fastening a leg (block) while assembling the table in task 2 irrespective of the number of legs used.                                                                |
| unfastened screw        | Not fastening an inserted screw with a nut in the assembly of the record player (task 3) irrespective of the number of screws used.                                      |
| missing screw           | Assembling the record player (task 3) with less than the required two screws.                                                                                            |
| extra screw             | Assembling the record player (task 3) with more than the required two screws.                                                                                            |
| extra ring              | Using more than one ring in the final assembly of the record player in task 3.                                                                                           |
| no balancing            | Not balancing the part on the plate while assembling the record player in task 3.                                                                                        |

Table 3. Our defined error functions.

| Function                                            | Definition                                                                           |
|-----------------------------------------------------|--------------------------------------------------------------------------------------|
| $\mathcal{F}_{\text{idle time}}$                    | $f_{\text{in-between background}}$                                                   |
| $\mathcal{F}_{\text{dropping item without pickup}}$ | $\max(f_{\text{drop}} - f_{\text{pickup}}, 0)$                                       |
| $\mathcal{F}_{\text{Missing part}}$                 | $\max(3 - f_{\text{take part}}, 0)$                                                  |
| $\mathcal{F}_{\text{Missing ring}}$                 | $\max(1 - f_{\text{take ring}}, 0)$                                                  |
| $\mathcal{F}_{\text{Missing leg}}$                  | $\max(4 - f_{\text{take block}}, 0)$                                                 |
| $\mathcal{F}_{\text{Unfastened leg}}$               | $\max(f_{\text{take block}} - (f_{\text{fasten screw}} + f_{\text{spin block}}), 0)$ |
| $\mathcal{F}_{\text{unfastened screw}}$             | $\max(f_{\text{insert screw}} - f_{\text{fasten nut}}, 0)$                           |
| $\mathcal{F}_{\text{Missing screw}}$                | $\max(2 - f_{\text{insert screw}}, 0)$                                               |
| $\mathcal{F}_{\text{Extra screw}}$                  | $\max(f_{\text{insert screw}} - 2, 0)$                                               |
| $\mathcal{F}_{\text{Extra ring}}$                   | $\max(f_{\text{insert ring}} - 1, 0)$                                                |
| $\mathcal{F}_{\text{no balancing}}$                 | $\max(1 - f_{\text{balance part}}, 0)$                                               |
